# Supplementary material for: Concurrent Exposure of Bottlenose Dolphins (Tursiops truncatus) to Multiple Algal Toxins in Sarasota Bay, Florida, USA
Source: PubMed Central journal article supplement (PMC3053359; doi:10.1371/journal.pone.0017394), 2011-03-10
Supplement: pone.0017394.s002.pdf [file pone.0017394.s002.pdf]

Table S2\_Concentration of domoic acid (ng/mL or ng/g) in various animal samples

|       | June-00                 |       | February-04 |  | June-04                      |       | February-05 |  | June-05                      |       |
|-------|-------------------------|-------|-------------|--|------------------------------|-------|-------------|--|------------------------------|-------|
|       | Urine (mean ELISA/LCMS) |       | Urine LC/MS |  | Urine (mean ELI) Blood ELISA |       | Urine LC/MS |  | Urine (mean ELI) Blood ELISA |       |
| FB10  |                         |       |             |  |                              |       |             |  |                              |       |
| FB100 |                         |       |             |  |                              |       |             |  |                              |       |
| FB101 |                         | <dl   |             |  |                              |       |             |  |                              |       |
| FB109 |                         |       |             |  |                              |       |             |  |                              |       |
| FB11  |                         | 2.66  |             |  |                              |       |             |  |                              |       |
| FB113 |                         |       |             |  |                              |       |             |  |                              |       |
| FB114 |                         |       |             |  |                              | <dl   |             |  |                              |       |
| FB117 |                         | <dl   |             |  |                              |       |             |  |                              |       |
| FB118 |                         |       |             |  |                              |       |             |  |                              |       |
| FB119 |                         | 6.62  |             |  |                              |       |             |  |                              |       |
| FB123 |                         |       |             |  |                              |       |             |  |                              |       |
| FB125 |                         |       |             |  |                              |       |             |  |                              |       |
| FB127 |                         |       |             |  |                              |       |             |  |                              |       |
| FB13  |                         | 9.54  |             |  |                              |       |             |  |                              |       |
| FB133 |                         |       |             |  |                              |       |             |  |                              |       |
| FB135 |                         |       |             |  |                              |       | <dl         |  |                              |       |
| FB137 |                         |       |             |  |                              |       |             |  |                              |       |
| FB138 |                         |       |             |  |                              | <dl   | <dl         |  |                              |       |
| FB14  |                         | 5.32  |             |  |                              |       |             |  |                              |       |
| FB141 |                         |       |             |  |                              |       |             |  |                              |       |
| FB146 |                         | 3.10  |             |  |                              |       |             |  |                              | <dl   |
| FB148 |                         |       |             |  |                              | <dl   | <dl         |  |                              |       |
| FB15  |                         |       |             |  |                              |       |             |  |                              |       |
| FB151 |                         |       |             |  |                              |       |             |  |                              |       |
| FB155 |                         | 1.40  |             |  |                              |       |             |  |                              | 1.32  |
| FB157 |                         |       |             |  |                              |       |             |  |                              | <dl   |
| FB159 |                         |       |             |  |                              | 6.10  | <dl         |  |                              |       |
| FB164 |                         |       |             |  |                              |       |             |  |                              |       |
| FB173 |                         |       |             |  |                              |       |             |  |                              |       |
| FB174 |                         | 4.45  |             |  |                              |       |             |  |                              |       |
| FB175 |                         |       |             |  |                              |       |             |  |                              |       |
| FB177 |                         |       |             |  |                              |       |             |  |                              |       |
| FB178 |                         | <dl   |             |  |                              |       |             |  |                              |       |
| FB179 |                         |       |             |  |                              |       |             |  |                              |       |
| FB181 |                         |       |             |  |                              | 10.47 | <dl         |  |                              |       |
| FB182 |                         |       |             |  |                              |       |             |  |                              |       |
| FB185 |                         |       |             |  |                              | 5.94  | <dl         |  |                              | 16.74 |
| FB187 |                         |       |             |  |                              |       |             |  |                              | <dl   |
| FB188 |                         |       |             |  |                              | 1.97  | <dl         |  |                              |       |
| FB189 |                         |       |             |  |                              |       |             |  |                              |       |
| FB193 |                         |       |             |  |                              |       |             |  |                              |       |
| FB195 |                         |       |             |  |                              |       |             |  |                              | <dl   |
| FB196 |                         |       |             |  |                              | 5.06  | <dl         |  |                              |       |
| FB197 |                         |       |             |  |                              |       |             |  |                              | <dl   |
| FB198 |                         |       |             |  |                              |       |             |  |                              |       |
| FB199 |                         |       |             |  |                              |       |             |  |                              | 6.03  |
| FB20  |                         |       |             |  |                              | 21.80 | <dl         |  |                              |       |
| FB203 |                         |       |             |  |                              |       |             |  |                              |       |
| FB205 |                         |       |             |  |                              |       |             |  |                              |       |
| FB207 |                         |       |             |  |                              |       |             |  |                              |       |
| FB209 |                         |       |             |  |                              |       |             |  |                              |       |
| FB213 |                         |       |             |  |                              |       |             |  |                              |       |
| FB215 |                         |       |             |  |                              |       |             |  |                              |       |
| FB217 |                         |       |             |  |                              |       |             |  |                              |       |
| FB218 |                         |       |             |  |                              |       |             |  |                              | <dl   |
| FB219 |                         |       |             |  |                              |       |             |  |                              |       |
| FB220 |                         |       |             |  |                              |       |             |  |                              | <dl   |
| FB224 |                         |       |             |  |                              |       |             |  |                              |       |
| FB226 |                         |       |             |  |                              |       |             |  |                              |       |
| FB228 |                         |       |             |  |                              |       |             |  |                              |       |
| FB230 |                         |       |             |  |                              | 1.98  | <dl         |  |                              |       |
| FB232 |                         |       |             |  |                              |       |             |  |                              |       |
| FB234 |                         |       |             |  |                              |       |             |  |                              | 7.98  |
| FB236 |                         |       |             |  |                              |       |             |  |                              | 9.18  |
| FB238 |                         |       |             |  |                              |       |             |  |                              |       |
| FB240 |                         |       |             |  |                              |       |             |  |                              |       |
| FB242 |                         |       |             |  |                              |       |             |  |                              |       |
| FB248 |                         |       |             |  |                              |       |             |  |                              |       |
| FB25  |                         |       |             |  |                              |       |             |  |                              |       |
| FB250 |                         |       |             |  |                              |       |             |  |                              |       |
| FB252 |                         |       |             |  |                              |       |             |  |                              |       |
| FB254 |                         |       |             |  |                              |       |             |  |                              |       |
| FB256 |                         |       |             |  |                              |       |             |  |                              |       |
| FB26  |                         | 3.23  |             |  |                              |       |             |  |                              |       |
| FB27  |                         |       |             |  |                              |       |             |  |                              |       |
| FB28  |                         | 1.21  |             |  |                              |       |             |  |                              |       |
| FB32  |                         | 1.52  |             |  |                              |       |             |  |                              |       |
| FB33  |                         | 3.60  |             |  |                              |       |             |  |                              |       |
| FB36  |                         |       |             |  |                              |       |             |  |                              |       |
| FB43  |                         | <dl   |             |  |                              |       |             |  |                              |       |
| FB48  |                         | 9.50  |             |  |                              |       |             |  |                              |       |
| FB54  |                         |       |             |  |                              |       |             |  |                              |       |
| FB55  |                         |       |             |  |                              |       |             |  |                              |       |
| FB58  |                         | 12.29 |             |  |                              |       |             |  |                              |       |
| FB65  |                         |       |             |  |                              |       |             |  |                              |       |
| FB7   |                         |       |             |  |                              |       |             |  |                              |       |
| FB75  |                         |       |             |  |                              |       |             |  |                              | <dl   |
| FB9   |                         |       |             |  |                              |       |             |  |                              |       |
| FB90  |                         |       |             |  |                              |       |             |  |                              |       |
| FB92  |                         |       |             |  |                              | 1.04  | <dl         |  |                              |       |
| FB99  |                         |       |             |  |                              | 8.5   | <dl         |  |                              |       |

Note: "<dl" denotes below limit of detection and "trace" denotes greater than limit of detection but less than limit of quantification

| June-06     | May-08      |               |             |             |             |             | May-09      |             |             |                    |            |
|-------------|-------------|---------------|-------------|-------------|-------------|-------------|-------------|-------------|-------------|--------------------|------------|
| Urine LC/MS | Blood ELISA | Gastric LC/MS | Serum ELISA | Urine LC/MS | Fecal LC/MS | Urine LC/MS | Blood LC/MS | serum LC/MS | feces LC/MS | gastric fluid LC/M | milk LC/MS |
| <dl         |             |               |             |             |             |             |             |             |             |                    |            |
| <dl         |             |               |             |             |             |             |             |             |             |                    |            |
| <dl         | <dl         | <dl           | <dl         | 1.00        | 10.30       |             |             |             |             |                    |            |
|             |             |               |             |             |             |             |             |             |             |                    |            |
| <dl         | <dl         | <dl           | <dl         | <dl         |             |             |             | <dl         | 15          | <dl                | <dl        |
|             |             |               |             |             |             |             |             |             |             |                    |            |
| <dl         | <dl         | <dl           | <dl         | <dl         |             |             |             | <dl         | 11.5        | <dl                |            |
|             |             |               |             |             |             |             |             | <dl         | 6.5         | <dl                | <dl        |
| <dl         | <dl         | <dl           | <dl         | 1.60        | 9.40        |             |             | <dl         | 37          | <dl                |            |
| <dl         |             |               |             |             |             |             |             |             |             |                    |            |
| <dl         | <dl         | <dl           | <dl         | <dl         | <dl         |             |             |             |             |                    |            |
|             |             |               |             |             |             |             |             |             |             |                    |            |
| <dl         | <dl         | <dl           | <dl         | <dl         | <dl         |             |             |             |             |                    |            |
|             |             |               |             |             |             |             |             |             |             |                    |            |
| <dl         | <dl         | <dl           | <dl         | <dl         | <dl         |             |             | <dl         |             | <dl                |            |
|             |             |               |             |             |             |             |             |             |             |                    |            |
| <dl         | <dl         | <dl           | <dl         | 1.80        | 4.90        |             |             |             |             |                    |            |
|             |             |               |             |             |             |             |             |             |             |                    |            |
| <dl         | <dl         | <dl           | <dl         | 6.10        |             |             |             |             |             |                    |            |
|             |             |               |             |             |             |             |             |             |             |                    |            |
| <dl         | <dl         | <dl           | <dl         | 17.60       | 41.50       |             |             | <dl         | 36          | 2.2                |            |
|             |             |               |             |             |             |             |             |             |             |                    |            |
| <dl         | <dl         | <dl           | <dl         | 4.40        | 8.50        |             |             | <dl         |             |                    |            |
|             |             |               |             |             |             |             |             |             |             |                    |            |
| <dl         |             |               |             |             |             |             |             | trace       |             | trace              | <dl        |
|             |             |               |             |             |             |             |             | 2.4         |             |                    |            |
| <dl         |             |               |             |             |             |             |             | trace       |             |                    | <dl        |
|             |             |               |             |             |             |             |             |             |             |                    |            |
| <dl         |             |               |             |             |             |             |             |             | 4           | <dl                | <dl        |
|             |             |               |             |             |             |             |             |             |             |                    |            |
| <dl         |             |               |             |             |             |             |             |             | 4           | <dl                |            |
