# Supplementary material for: Concurrent Exposure of Bottlenose Dolphins (Tursiops truncatus) to Multiple Algal Toxins in Sarasota Bay, Florida, USA
Source: PLoS One. 2011 Mar 10;6(3):e17394. doi: 10.1371/journal.pone.0017394 (PMC3053359; doi:10.1371/journal.pone.0017394)
Supplement: Table S1 — Concentration of brevetoxin (ng/mL or ng/g) in various animal samples. (PDF) [file pone.0017394.s001.pdf]

Table S1\_Concentration of brevetoxin (ng/mL or ng/g) in various animal samples

|       | June-00   |             | February-04 |            | June-04   |             | February-05 |             | June-05   |             |             |     |
|-------|-----------|-------------|-------------|------------|-----------|-------------|-------------|-------------|-----------|-------------|-------------|-----|
|       | Urine RIA | Serum ELISA | Blood ELISA | Urine LCMS | Urine RIA | Blood ELISA | Urine RIA   | Blood ELISA | Urine RIA | Blood ELISA | Serum ELISA |     |
| FB10  |           |             |             |            |           |             |             |             |           |             |             | <dl |
| FB100 |           |             |             |            |           |             |             |             |           |             |             | <dl |
| FB101 |           |             |             |            |           |             |             |             |           |             |             | <dl |
| FB109 |           |             |             |            |           |             |             |             |           |             |             | <dl |
| FB11  |           |             |             |            |           |             |             |             |           |             |             | <dl |
| FB113 |           |             |             |            |           |             |             |             |           |             |             | <dl |
| FB114 |           |             |             |            |           |             |             |             |           |             |             | <dl |
| FB117 | <dl       | <dl         |             |            |           | <dl         |             |             |           |             |             | <dl |
| FB118 |           |             | 0.30        |            |           |             |             |             | 7.10      | <dl         |             |     |
| FB119 |           |             |             |            |           |             |             |             |           |             |             |     |
| FB123 |           |             |             |            |           |             |             |             |           |             |             |     |
| FB125 |           |             | <dl         |            |           |             |             |             |           |             |             |     |
| FB127 |           |             |             |            |           |             |             |             |           |             |             |     |
| FB13  |           |             |             |            |           |             |             |             |           |             |             |     |
| FB133 |           |             |             |            |           |             |             |             |           |             |             |     |
| FB135 |           |             |             |            |           |             |             |             | <dl       | <dl         |             | <dl |
| FB137 |           |             |             |            |           |             |             |             |           |             |             |     |
| FB138 |           |             |             |            |           |             |             |             |           |             |             | <dl |
| FB14  |           |             |             |            |           |             |             |             |           |             |             |     |
| FB141 |           |             |             |            |           |             |             |             |           |             |             |     |
| FB146 |           |             |             |            |           |             |             |             |           |             |             |     |
| FB148 |           |             |             |            |           |             |             |             |           |             |             |     |
| FB15  |           |             |             |            |           |             |             |             |           |             |             |     |
| FB151 |           |             |             |            |           |             |             |             |           |             |             |     |
| FB155 |           |             |             |            |           |             |             |             |           |             |             |     |
| FB157 |           |             |             |            |           |             |             |             |           |             |             |     |
| FB159 |           |             |             |            |           |             |             |             |           |             |             |     |
| FB164 |           |             |             |            |           |             |             |             |           |             |             |     |
| FB173 |           |             | 1.30        |            |           |             |             |             |           |             |             |     |
| FB174 |           |             |             |            |           |             |             |             |           |             |             |     |
| FB175 |           |             | 0.90        |            |           |             |             |             |           |             |             |     |
| FB177 |           |             | 1.20        |            |           |             |             |             |           |             |             |     |
| FB178 |           |             | <dl         |            |           |             |             |             |           |             |             |     |
| FB179 |           |             | 0.60        | 0.53       |           |             |             |             |           |             |             |     |
| FB181 |           |             |             |            |           |             |             |             |           |             |             |     |
| FB182 |           |             |             |            |           |             |             |             |           |             |             |     |
| FB185 |           |             |             |            |           |             |             |             |           |             |             |     |
| FB187 |           |             |             |            |           |             |             |             |           |             |             |     |
| FB188 |           |             | 0.60        |            |           |             |             |             |           |             |             |     |
| FB189 |           |             |             |            |           |             |             |             |           |             |             |     |
| FB193 |           |             |             |            |           |             |             |             |           |             |             |     |
| FB195 |           |             |             |            |           |             |             |             |           |             |             |     |
| FB196 |           |             |             |            |           |             |             |             |           |             |             |     |
| FB197 |           |             |             |            |           |             |             |             |           |             |             |     |
| FB198 |           |             |             |            |           |             |             |             |           |             |             |     |
| FB199 |           |             |             |            |           |             |             |             |           |             |             |     |
| FB20  |           |             |             |            |           |             |             |             |           |             |             |     |
| FB203 |           |             |             |            |           |             |             |             |           |             |             |     |
| FB205 |           |             |             |            |           |             |             |             |           |             |             |     |
| FB207 |           |             |             |            |           |             |             |             |           |             |             |     |
| FB209 |           |             |             |            |           |             |             |             |           |             |             |     |
| FB213 |           |             |             |            |           |             |             |             |           |             |             |     |
| FB216 |           |             |             |            |           |             |             |             |           |             |             |     |
| FB217 |           |             |             |            |           |             |             |             |           |             |             |     |
| FB218 |           |             |             |            |           |             |             |             |           |             |             |     |
| FB219 |           |             |             |            |           |             |             |             |           |             |             |     |
| FB220 |           |             |             |            |           |             |             |             | 2.10      | <dl         |             |     |
| FB224 |           |             |             |            |           |             |             |             | 2.90      | <dl         |             |     |
| FB226 |           |             | <dl         |            |           |             |             |             |           |             |             |     |
| FB228 |           |             | 0.90        |            |           |             |             |             |           |             |             |     |
| FB230 |           |             |             |            |           |             |             |             |           |             |             |     |
| FB232 |           |             |             |            |           |             |             |             |           |             |             |     |
| FB234 |           |             |             |            |           |             |             |             |           |             |             |     |
| FB236 |           |             |             |            |           |             |             |             |           |             |             |     |
| FB238 |           |             |             |            |           |             |             |             |           |             |             |     |
| FB240 |           |             |             |            |           |             |             |             |           |             |             |     |
| FB242 |           |             |             |            |           |             |             |             |           |             |             |     |
| FB246 |           |             |             |            |           |             |             |             |           |             |             |     |
| FB25  |           |             |             |            |           |             |             |             |           |             |             |     |
| FB250 |           |             |             |            |           |             |             |             |           |             |             |     |
| FB252 |           |             |             |            |           |             |             |             |           |             |             |     |
| FB254 |           |             |             |            |           |             |             |             |           |             |             |     |
| FB256 |           |             |             |            |           |             |             |             |           |             |             |     |
| FB26  |           |             |             |            |           |             |             |             |           |             |             |     |
| FB27  |           |             | 0.70        |            |           |             |             |             |           |             |             |     |
| FB28  |           |             |             |            |           |             |             |             |           |             |             |     |
| FB32  |           |             |             |            |           |             |             |             |           |             |             |     |
| FB33  |           |             |             |            |           |             |             |             |           |             |             |     |
| FB36  |           |             |             |            |           |             |             |             |           |             |             |     |
| FB43  |           |             |             |            |           |             |             |             |           |             |             |     |
| FB48  |           |             |             |            |           |             |             |             |           |             |             |     |
| FB54  |           |             |             |            |           |             |             |             |           |             |             |     |
| FB55  |           |             |             |            |           |             |             |             |           |             |             |     |
| FB58  |           |             |             |            |           |             |             |             |           |             |             |     |
| FB65  |           |             |             |            |           |             |             |             |           |             |             |     |
| FB7   |           |             |             |            |           |             |             |             |           |             |             |     |
| FB75  |           |             |             |            |           |             |             |             |           |             |             |     |
| FB9   |           |             | 1.60        |            |           |             |             |             | 6.70      | <dl         |             |     |
| FB90  |           |             |             |            |           |             |             |             |           |             |             |     |
| FB92  |           |             |             |            |           |             |             |             |           |             |             |     |
| FB99  |           |             |             |            |           |             |             |             |           |             |             |     |

Note: '&lt;dl' denotes below limit of detection

| June-06                |           | May-08          |                   |                 |             |                 |  | May-09      |             |             |             |                     |            |              |
|------------------------|-----------|-----------------|-------------------|-----------------|-------------|-----------------|--|-------------|-------------|-------------|-------------|---------------------|------------|--------------|
| Urine RIA              | Feces RBA | Blood RIA/ELISA | Gastric RIA/ELISA | Serum RIA/ELISA | Urine LC/MS | Feces RIA/ELISA |  | Urine ELISA | Blood ELISA | serum ELISA | feces ELISA | gastric fluid ELISA | milk ELISA | feces (LCMS) |
| 2.60<br>3.40           |           |                 |                   |                 |             |                 |  |             |             |             |             |                     |            |              |
| 0.80                   | <dl       | <dl             | 6.70              | <dl             | <dl         | 13.60           |  |             |             |             |             |                     |            |              |
|                        |           |                 |                   |                 |             |                 |  | <dl         |             | <dl         | 32          | <dl                 | <dl        | 7.9          |
| 2.00                   | <dl       | <dl             | 5.20              | <dl             | <dl         |                 |  | <dl         |             | <dl         |             | <dl                 |            |              |
|                        |           |                 |                   |                 |             |                 |  | <dl         | <dl         | <dl         | 3           | <dl                 | <dl        | <dl          |
| 1.60<br>26.30<br>32.50 | <dl       | <dl             | 6.50              | <dl             | <dl         | 30.00           |  | <dl         | <dl         | <dl         | <dl         | <dl                 | <dl        |              |
|                        |           | <dl             |                   | <dl             |             |                 |  |             |             |             |             |                     |            |              |
|                        | <dl       | <dl             | 4.60              | <dl             | <dl         | 12.30           |  |             |             |             |             |                     |            |              |
|                        |           | <dl             | 4.30              | <dl             | <dl         | 2.30            |  |             |             |             |             |                     |            |              |
|                        |           | <dl             |                   | <dl             |             |                 |  | <dl         |             | <dl         |             | <dl                 |            |              |
| 63.40                  |           | <dl             | 3.70              | <dl             | <dl         |                 |  | <dl         |             | <dl         |             | <dl                 |            |              |
|                        |           | <dl             | 5.60              | <dl             | <dl         |                 |  | <dl         |             | <dl         |             | <dl                 |            |              |
|                        |           | <dl             | 4.10              | <dl             | <dl         |                 |  | <dl         | <dl         | <dl         |             | <dl                 |            |              |
|                        |           | <dl             | 5.40              | <dl             | <dl         |                 |  | <dl         | <dl         | <dl         |             | <dl                 |            |              |
|                        |           | <dl             | 4.50              | <dl             | <dl         |                 |  | <dl         | <dl         | <dl         |             | <dl                 |            |              |
|                        |           | <dl             |                   | <dl             |             |                 |  | <dl         | <dl         | <dl         | 06          | <dl                 |            | <dl          |
|                        |           | <dl             | <dl               | <dl             | <dl         | 13.60           |  |             |             |             |             |                     |            |              |
|                        |           |                 |                   |                 |             |                 |  |             |             |             |             |                     |            |              |
| 1.00                   | 109.00    |                 |                   |                 |             |                 |  |             |             |             |             |                     |            |              |
|                        |           | <dl             | 10.50             | <dl             | <dl         | 3.50            |  | <dl         | <dl         | <dl         | 09          | <dl                 |            | <dl          |
|                        |           |                 |                   |                 |             |                 |  |             |             |             |             |                     |            |              |
| 89.70                  |           |                 |                   |                 |             |                 |  |             |             |             |             |                     |            |              |
| 1.60                   |           |                 |                   |                 |             |                 |  | <dl         | <dl         | <dl         | 3           | <dl                 | <dl        | <dl          |
|                        |           |                 |                   |                 |             |                 |  |             |             |             |             |                     |            |              |
| 2.40                   | <dl       |                 |                   |                 |             |                 |  | <dl         | <dl         | <dl         | 9           | <dl                 |            | <dl          |
